1        Computerized physical exercise improves the functional  
2                architecture of the brain in patients with Parkinson's  
3                Disease: a network science resting-state EEG study  
4

5        Vasileios Rafail Xefferis<sup>1</sup>, Charis Styliadis<sup>1</sup>, Alexandra Anagnostopoulou<sup>1</sup>, Panagiotis  
6        Kartsidis<sup>1</sup>, Evangelos Paraskevopoulos<sup>1,2</sup>, Manousos Klados<sup>3</sup>, Vasiliki Zilidou<sup>1</sup>, Maria  
7        Karagianni<sup>1</sup>, Panagiotis D. Bamidis<sup>1</sup>

8  
9        <sup>1</sup> Medical Physics Laboratory, School of Medicine, Faculty of Health Sciences,  
10        Aristotle University of Thessaloniki, University Campus, 54124, Thessaloniki, Greece

11        <sup>2</sup> Department of Psychology, University of Cyprus, P.C. CY 1678, Nicosia, Cyprus

12        <sup>3</sup> Department of Psychology, The University of Sheffield International Faculty, City  
13        College, 24, Proxenou Koromila Street, 546 22 Thessaloniki, Greece

14  
15        **Short title:** Training-induced plasticity in patients with Parkinson's Disease

16  
17        **Corresponding Author:** Dr. Charis Styliadis, School of Medicine, Faculty of Health  
18        Sciences, Aristotle University of Thessaloniki, Thessaloniki, Greece. Aristotle  
19        University of Thessaloniki, University Campus, P.C. 54124, Thessaloniki, Greece. Tel:  
20        +30-2310-999310. Fax: +30-2310-999702. Email: [cstyliadis@auth.gr](mailto:cstyliadis@auth.gr)

21  
22        **Keywords:** Parkinson's Disease, Computerized Physical Training,  
23        Electroencephalography, Graph Theory, Phase Transfer Entropy, Reparative  
24        Neuroplasticity

25  
26        **Abstract**

27        Physical exercise is an effective non-pharmaceutical treatment for Parkinson's  
28        disease (PD) symptoms, both motor and non-motor. Despite the numerous reports on  
29        the neuroplastic role of physical exercise in patients with PD (PwPD), its effects have  
30        not been thoroughly explored via brain network science, which can provide a coherent

**NOTE:** This preprint reports new research that has not been certified by peer review and should not be used to guide clinical practice.

31 framework for understanding brain functioning. We used resting-state EEG data to  
32 investigate the functional connectivity changes of the brain's intrinsic cortical networks  
33 due to physical exercise. The brain activity of 14 PwPD before and after a ten-week  
34 protocol of computerized physical training was statistically compared to quantify  
35 changes in directed functional connectivity in conjunction with psychometric and  
36 somatometric assessments. PwPD showed a significant reorganization of the post-  
37 training brain network along with increases in their physical capacity. Specifically, our  
38 results revealed significant adjustments in clustering, increased characteristic path  
39 length, and decreased global efficiency, in correlation to the improved physical  
40 capacity. Our results go beyond previous findings by indicating a transition to a  
41 reparative network architecture of enhanced connectivity. We present a meaningful  
42 relationship between network characteristics and motor execution capacity which  
43 support the use of motor treatment in tandem with medication. This trial is registered  
44 with ClinicalTrials.gov Identifier [NCT04426903](#).

45

## 46 **Impact Statement**

47 The effects of physical training (PT) on the neuroplasticity attributes of patients with  
48 Parkinson's Disease (PwPD) have been well documented via neurophysiological  
49 evaluations. However, there is a knowledge gap on the role of training-induced  
50 neuroplasticity in whole-brain network organization. We investigated the PT effects on  
51 the brain network organization of 14 PwPD, using EEG and network indices coupled  
52 with psychosomatometric tests. We report evidence of reparative functional  
53 reorganization of the brain with more balanced integration and segregation abilities, in  
54 correlation to improved motor performance. The PD brain can repair and reestablish a  
55 better level of motor execution and control due to computer-empowered physical  
56 stimulation.

57

## 58 **Introduction**

59 Neuroplasticity is the brain's ability to adjust and reorganize itself across an  
60 organism's lifespan in both health and disease [1]. Patients with Parkinson's Disease  
61 (PwPD), in contrast to healthy old adults, experience loss of dopaminergic brain cells  
62 of the substantia nigra projecting to the striatum [2]. Dopamine influences synaptic  
63 plasticity [3], and thus, dopaminergic neural loss in PD leads to an impaired  
64 neuroplastic ability [4].

65 PD progression is characterized by brain atrophy, mainly in anterior brain regions  
66 but also extending to posterior ones [5], [6], as well as disconnections between brain  
67 regions [7]–[10]. Consequently, PD has been described as a disconnection syndrome  
68 with relevance to cognition, perception, and other neuropsychological domains [11].  
69 Clear implications of this notion emerge from the study of the brain's intrinsic resting-  
70 state networks (RSNs). For instance, altered connectivity of the default mode network  
71 (DMN) can have a detrimental effect on the cognitive capacity of PwPD [9], [10], [12],  
72 [13], while temporal-occipital disconnections between the visual (VIS) network and  
73 DMN have been correlated with visuospatial impairment [9], [13]. Disruptions in the  
74 interconnections of the DMN and the frontoparietal network (FPN) can affect both  
75 executive functioning and cognition [12], while disturbances in the sensorimotor  
76 network and somatomotor (SMN) one have been found to relate to motor symptoms  
77 of PD [7], [9], [14].

78 A healthy human brain organizes itself in what is called a small-world (SW) network.  
79 SW organization features balanced local (local clustering of connections) and global  
80 (long-range connections) efficiency; both deemed essential for healthy brain function  
81 [15]. The brain network architecture of PwPD shows disruption of SW architecture  
82 towards a more random brain organization [9], [16]. This disruption is reported even at  
83 the very early stages of the disease, meaning lower segregation (local clustering), but  
84 preserved integration (average path length) [9], [16]. Along with the disease's  
85 progression, the brain's functional architecture further deviates from the SW  
86 organization as it loses both local and global efficiency in correlation to PD-related  
87 cognitive decline [16], [17].

88 Though one would expect that network abnormalities would limit plasticity, the PD  
89 brain can still feature neuroplastic capabilities, at least as compensatory mechanisms  
90 [18], [19]. For instance, PD-related motor deficits only arise after approximately 80%  
91 depletion of striatal dopamine [20], and thus, the underlying compensatory  
92 mechanisms delay the emergence of clinical symptoms in PD [18]. This compensatory  
93 reorganization is more dominant in the motor tracts, suggesting selective  
94 neurodegeneration [19].

95 From a therapeutic perspective, only pharmaceutical symptomatic treatments are  
96 available, often having potential side effects [21]. In contrast, neuroscientific evidence  
97 on brain-derived neurotrophic factor (BDNF) changes [22] or volumetric changes [23]  
98 in PwPD have shown promise for effective physical training (PT) protocols, which can  
99 trigger neuroplasticity and neuroprotection [24]. For instance, non-computerized PT  
100 can benefit muscular strength, mobility, and postural disabilities of PwPD [25],  
101 improving their confidence [26] and quality of life [27]. Computer-based training has

102 shown to be profitable for healthy elders [28] and elderly with neurodegenerative  
103 disorders, e.g., mild cognitive impairment (MCI) [29]. Despite the rare exploitation of  
104 computerized PT by means of (serious) game-based training, there are promising  
105 findings such as improved balance [30], rate of falls, and confidence in PwPD [31].

106 Given the network disruption in PD [32], [33], investigations into neuronal network  
107 reorganization due to PT may be helpful to bridge the gap between the mechanisms  
108 underlying the effectiveness of non-pharmaceutical interventions and clinical  
109 presentations in PD. To our knowledge, only a few studies have examined functional  
110 connectivity changes following a non-computerized PT program [34]–[36] but these  
111 focused on the motor circuitry. Evidence in regard to computer-assisted PT for PwPD,  
112 though more scarce, has shown whole-brain network connectivity changes, and  
113 suggests that treadmill training with virtual reality can offer better results in PwPD (i.e.  
114 greater connectivity within the sensorimotor network and the cerebellar network in  
115 association with improved walking performance) [37].

116 Here, we aim to narrow the knowledge gap in PD literature regarding the  
117 reorganization of the whole brain architecture and the relevant changes in network  
118 characteristics as a result of PT while at the same time offer innovative means and  
119 tools to facilitate such training. We hypothesized that our computerized PT scheme,  
120 combining aerobic, flexibility, strength, and balance exercises, could trigger the  
121 reorganization of the brain network in a reparative manner, namely towards a network  
122 architecture of SW properties. To this aim, we used eyes-closed resting-state  
123 electroencephalographic (EEG) recordings before and after the 10-week long  
124 WebFitForAll [28] intervention. Source analysis was performed using low resolution  
125 electromagnetic tomography (LORETA) [38], and directed functional connectivity was  
126 estimated via phase transfer entropy (PTE) [39] in the 1-30 Hz frequency band. An  
127 FDR corrected t-test statistical comparison was performed to identify the significant  
128 connectivity changes (post- vs. pre-intervention). We also computed selected graph-  
129 theoretical parameters that describe integration, segregation, and hierarchy to  
130 characterize plasticity in the PD brain and investigate how the training-induced  
131 neuroplasticity affects the state of the PD network.

132

## 133 **Results**

### 134 **Psychometric and somatometric results**

135 Psychosomatometric comparisons between the pre- and post-intervention scores  
136 were performed using non-parametric Wilcoxon tests and paired t-tests. We found

137 statistically significant increases in the scores of the Berg Balance Scale (BBS) [40],  
 138 the Short Physical Performance Battery (SPPB) [41] balance and total score, the  
 139 Community Balance & Mobility Scale (CB&M) [42], the Fullerton Senior Fitness Test  
 140 (SFT) [43] Arm curl and 2-min Step test, the Tinetti Performance Oriented Mobility  
 141 Assessment (POMA) [44], Gait and Total scores and decrease of the time of the 10  
 142 Meter Walk Test [45] on both self-selected and fast velocity and SFT 8-foot Up-and-  
 143 Go test. No statistically significant differences were found in the psychometric  
 144 evaluation tests (i.e., Mini-Mental State of Examination (MMSE) [46], Montreal  
 145 Cognitive Assessment (MoCA) [47], and Parkinson's Disease Questionnaire (PDQ-8)  
 146 [48]).

147

148 **Table 1.** Significant post vs. pre differences on somatometric tests and the post-pre  
 149 mean difference. The sign of the mean difference denotes the direction (effect) of the  
 150 changes. Results were considered significant for  $p < 0.05$ .

| Somatometric tests | p-value | t-value | Mean difference |
|--------------------|---------|---------|-----------------|
| BBS                | 0.019   | 2.326   | 1.71429         |
| SPPB Balance       | 0.028   | 2.482   | 0.42857         |
| SPPB Total         | 0.026   | 2.511   | 0.57143         |
| CB&M               | 0.003   | 3.215   | 6.85714         |
| SFT Arm Curl       | 0.028   | 2.349   | 2.357           |
| SFT 2-min Step     | 0.015   | 1.172   | 7.714           |
| SFT Up-and-Go      | 0.040   | -2.263  | -1.25714        |
| 10-meter time Self | 0.022   | -2.263  | -0.51500        |
| 10-meter time Fast | 0.011   | -3.126  | -0.27786        |
| POMA Gait          | 0.033   | 2.110   | 0.71429         |
| POMA Total         | 0.043   | 2.008   | 0.92857         |

151

## 152 PTE results

153 Statistical comparisons of the PTE matrices of the post vs. pre-intervention EEG  
 154 data indicate the reorganization of the PD resting-state network (45 nodes,  $p < 0.05$ ,  
 155 FDR corrected, 10000 permutations) (Figure 1). Specifically, the cortical  
 156 reorganization is characterized by the enhanced connections between: (i) middle and  
 157 inferior occipital nodes and parahippocampal, and middle and superior temporal nodes  
 158 of the left hemisphere, and inferior frontal, culmen, and fusiform nodes of the right  
 159 hemisphere, and (ii) right (middle and superior) frontal nodes and inferior frontal,  
 160 parahippocampal, middle occipital, and middle and superior temporal nodes of the left

161 hemisphere. In respect to the core resting-state networks, as defined by Yeo et al.[49],  
162 we have noted increased connectivity within the VIS, and between the VIS and each  
163 of the DMN, the dorsal attention network (DAN), the ventral attention network (VAN),  
164 SMN, and limbic (LIM) networks, the DMN and the SMN, as well as the FPN and the  
165 LIM, the VIS and the SMN. Figure 1 illustrates the statistically significant post to pre-  
166 intervention differences of the brain networks. For illustrative purposes, we also  
167 provide a circular graph of the brain connectivity network. Table 2 summarizes the  
168 connections between the core resting-state networks.

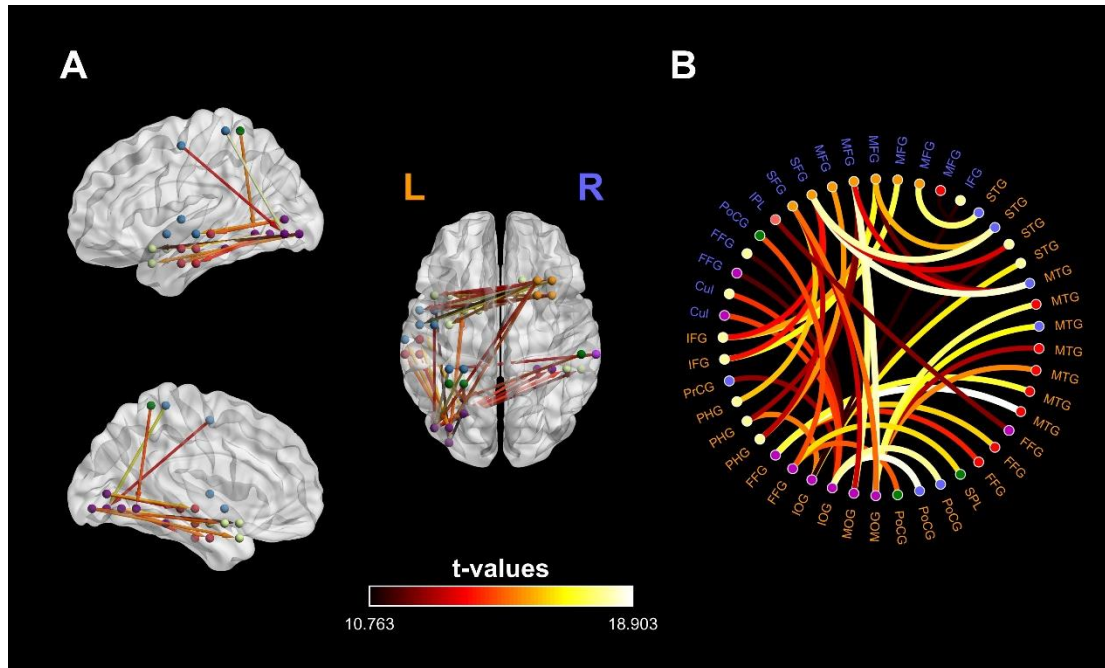

169  
170 **Figure 1.** Significant differences in cortical connectivity between post- and pre-  
171 intervention networks (orange denotes the left hemisphere and blue the right). Node  
172 colors correspond to distinct intrinsic resting-state networks [49] (Purple-Visual, Blue-  
173 Somatomotor, Green-Dorsal Attention, Violet-Ventral Attention, Cream-Limbic,  
174 Orange-Frontoparietal, Red Default Mode). **A:** Information direction is depicted  
175 through line arrows, and the color scale represents t-values. The visualized networks  
176 are significant at a level of  $p < 0.05$ , FDR corrected. **B:** Circular graph depicting the  
177 cortical reorganization in the PD brain. The cortical reorganization is characterized by  
178 the emergence of a direct connection between the left inferior occipital gyrus, the left  
179 middle occipital gyrus, the left middle temporal gyrus, the left superior temporal gyrus,  
180 the right middle frontal gyrus, and the fusiform gyrus.

181  
182 **Table 2.** Significant increase in connectivity of RSNs as defined by Yeo et al [49]. The  
183 black color signifies the within-network connectivity, the green color the bilateral



184 connectivity between-networks, and the blue color the unilateral connectivity between-  
185 networks from the RSN in the first column to the RSN in the first row.

| RSN | VIS | SMN | DAN | VAN | LIM | FPN | DMN |
|-----|-----|-----|-----|-----|-----|-----|-----|
| VIS |     |     |     |     |     |     |     |
| SMN |     |     |     |     |     |     |     |
| DAN |     |     |     |     |     |     |     |
| VAN |     |     |     |     |     |     |     |
| LIM |     |     |     |     |     |     |     |
| FPN |     |     |     |     |     |     |     |
| DMN |     |     |     |     |     |     |     |

186

### 187 Graph Measures

188 Graph theory analysis included measures of integration (Global Efficiency (GE),  
189 Characteristic Path Length (CPL)), segregation (Cluster Coefficient (CC), Transitivity  
190 (TS), Local Efficiency (LE), Modularity (Q), and node centrality (Betweenness  
191 Centrality (BC), Degree Centrality (DC)). Our graph-theoretical analysis, using each  
192 subject's adjacency matrix, revealed statistically significant differences in the GE, CPL,  
193 and TS (Table 3). We report a decrease in the GE and TS and an increase in the CPL  
194 due to our intervention. We found statistically significant increases and decreases in  
195 the local CC. The increase of CC was observed in 210 nodes, including bilateral frontal,  
196 temporal, parietal, and lingual lobes, and the right occipital lobe. The remaining 653  
197 nodes showed reduced CC after the intervention. Figure 2A depicts the nodes with  
198 increased CC, and Figure 2B those with decreased CC. LE, BC, DC, and Q did not  
199 show any statistically significant changes.

200

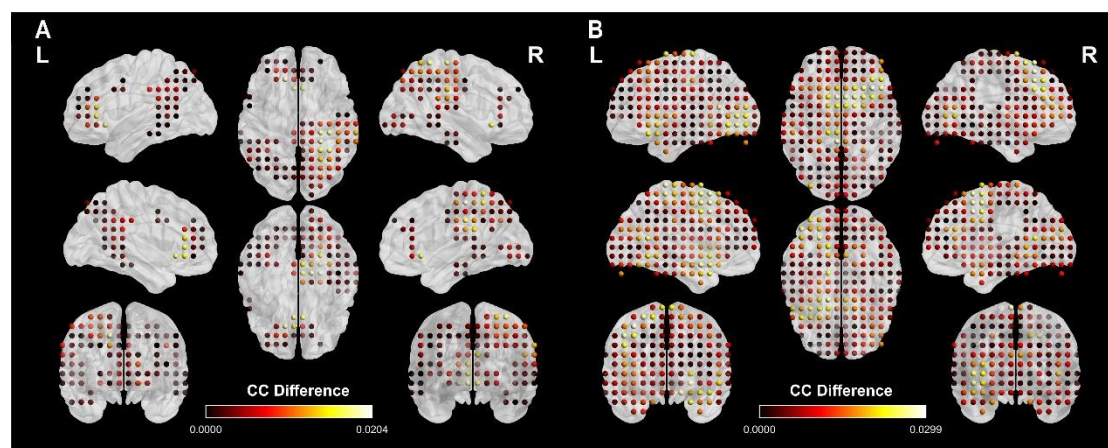

201

202 **Figure 2.** Whole-brain map of the statistically significant changes of the CC of the 863  
203 nodes. **A:** Increased CC in 210 nodes of bilateral frontal, temporal, parietal, and lingual  
204 lobes and right occipital lobe. **B:** Decreased CC in 653 nodes of bilateral frontal,  
205 lingual, occipital, parietal, and temporal lobes. The color map indicates the significance  
206 of the CC difference.

207

208 **Table 3.** Significant post-pre changes in global (Global efficiency, Transitivity,  
209 Characteristic Path Length) and local (Local Clustering Coefficient) graph measures,  
210 along with their mean differences. The sign of the mean difference denotes the  
211 direction (effect) of the changes. Results were considered significant for  $p < 0.05$ . \*For  
212 the local graph measures, the p-value reported is the mean value of the nodes showing  
213 the significant increase and decrease, respectively.

| Graph measures | p-value                | Mean difference |
|----------------|------------------------|-----------------|
| CPL            | 1.4402e-15             | 0.00649         |
| GE             | 1.8282e-26             | -0.00658        |
| TS             | 2.0489e-23             | -0.0061         |
| CC             | 2.8743e-13/4.6181e-12* | -0.01/0.00603   |

214

## 215 **Multiple Regression**

216 We tested for relations between network science indices and physical performance  
217 scores through linear regression analysis and found a statistically significant  
218 correlation between changes of SPPB total scores and graph theory indices of GE,  
219 CPL, and TS. We report that SPPB total score can predict GE ( $p = 0.011$ ,  $a = -0.092$ ,  
220  $b = 0$ ), CPL ( $p = 0.007$ ,  $a = 0.095$ ,  $b = 0$ ) and TS ( $p = 0.012$ ,  $a = -0.092$ ,  $b = 0$ ) changes.  
221 This means that higher scores in the SPPB test can potentially hint to the increase in  
222 CPL and decreases in GE and TS.

223

## 224 **Discussion**

225 Our findings indicate that a ten-week intervention of computerized physical training,  
226 in patients with PD, facilitates neuroplasticity, which consequently induces a beneficial  
227 cortical reorganization. Specifically, our results reveal that: (i) short-term PT influences  
228 positively the physical performance of PwPD, (ii) the PD brain can utilize  
229 neuroplasticity to reorganize itself in a reparative manner, (iii) reparative neuroplasticity  
230 may lead to a more flexible functional network, and (iv) the reparative reorganization  
231 correlates to the improvement of motor execution and control.



232

### 233 **Short-term training influences physical performance**

234 The statistically significant differences in mobility, static and dynamic balance,  
235 muscular strength and endurance, functional mobility, and gait speed and control, and  
236 reduced risk of falls (Table 1) are in line with previously reported findings [27], [50].  
237 Here, we report an improved motor performance in PwPD as an outcome of PT. It  
238 must be noted that our protocol targets multiple domains (i.e., aerobic, resistance,  
239 balance, and flexibility exercises), while most studies investigating the effects of PT on  
240 the somatic capacity of PwPD have focused mainly on a specific domain, i.e., strength  
241 [27] or aerobic [51] and, less often, on a combination of two or more domains [50].

242

### 243 **Cortical reorganization of the PD brain network**

244 Our results indicate the emergence of a reorganized brain network of enhanced  
245 connectivity, triggered by our computerized PT intervention, which involves  
246 connections mainly within the VIS and between the DMN and the VIS, and connections  
247 of the FPN with the LIM, VIS, and the SMN (Figure 1, Table 2). The enhanced  
248 connectivity within and between the RSNs indicates that PwPD present capacity for  
249 neuroplasticity and to functionally reorganize their brains. Our findings go beyond  
250 previous studies that examine the results of PT focusing only on the connectivity of the  
251 primary motor cortex [34]–[36]. By exploiting the innovations brought about by the use  
252 of a fully computerized program for PT and utilizing whole-head analysis, we report the  
253 arise of effective connections, thus provide further insight into the neuroplastic  
254 attributes of PwPD due to computerized PT.

255 The increased connectivity between the DMN and VIS hints towards the  
256 neuroprotective role of physical exercise in PD. The cognitive capacity of PwPD has  
257 been previously reported to positively correlate with the connectivity of the DMN and  
258 VIS, meaning reduced connectivity leads to reduced cognitive capacity, with the  
259 occipital gyrus having a key role [52], [53]. The patients' cognitive deterioration (i.e., in  
260 MCI) is accompanied by a loss of connections in the DMN, an effect evident from the  
261 early stages of the disease [54], meaning that cognitive decline in PD can be  
262 associated with disrupted connections in the DMN even in cognitively unimpaired  
263 PwPD [10]. As PD progresses, the occipital lobe exhibits hypoconnectivity with the  
264 temporal and frontal lobe [55], with changes in the visual system manifesting even  
265 before visual symptoms become clinically evident [56]. Additionally, the disrupted  
266 connectivity between the frontal and occipital cortex might also relate to typical non-  
267 motor symptomatology of PD, such as executive dysfunction, attention problems, or

268 lower performance in visuospatial tasks [13]. We report increased connectivity  
269 between the DMN and VIS (Figure 1, Table 2), with the direction of information, as  
270 reflected by the PTE, indicating that the left occipital gyrus modulates the activity of  
271 the left middle temporal gyrus of the DMN. These shifts in the connectivity of PwPD  
272 indicate the formation of a network that points to the training's reparative effect.

273 Regarding FPN's connections to other RSNs, the FPN seems to work here as a hub  
274 modulating LIM, VIS, and the SMN (Table 2), in line with its previously reported role  
275 as an adjustable hub among other networks for the flexible coordination of cognitive  
276 control [57]. The increased information flow from the FPN towards the LIM and the VIS  
277 networks could be interpreted as a mechanism of cognitive control and reorientation.  
278 Nevertheless, this assumption is not supported by our psychometric assessments. The  
279 modulation of the SMN from the FPN, combined with the statistically significant  
280 differences of the somatomotor assessments' scores, could index an information  
281 pathway offering improved motor control and execution.

282

### 283 **Global and local graph indexes reveal a transition towards a reparative PD** 284 **network organization**

285 Considering that the PD brain network features an abnormal structure towards  
286 randomness [16], we suggest that the reorganization of PD brain circuitry, due to PT,  
287 is characterized by a transition from a random-alike network towards a network  
288 architecture of SW-alike properties. Even though the reported decreased GE and  
289 increased CPL might indicate a step towards a less efficient network organization, this  
290 contradictory result could be explained as follows. Networks can be demonstrated  
291 inside a framework of regular, random, and complex networks. Regular networks  
292 appear to have high local and low global connectivity, while random networks show  
293 the contrary design with low local and high global connections [58]. The optimal  
294 function of human brain network architecture balances between integration and  
295 segregation by incorporating elements of regular and random networks to create a  
296 more complex architecture, the so-called SW organization [58]–[60]. Here, decreased  
297 GE and increased CPL, coupled with the fact that the PD brain network has a random-  
298 alike structure, indicates excessive network integration in PwPD. This is further  
299 supported by evidence that as cognitive impairment becomes more severe, the  
300 network of PwPD shows higher GE and lower CPL, indicating more randomness [61].  
301 Thus, our findings of lower GE and higher CPL could index the triggering of reparation  
302 neuroplasticity.

303 It is plausible that the transition's attributes would at some point (e.g. due to more  
304 intense and/or longer duration of the training) reflect a SW network topology (Figure  
305 3). Here, the SW-alike attributes are present not only on a local level as well. Changes  
306 of the CC (Figure 2) indicate a more robust functional clustering organization, further  
307 supporting our suggestion of a reparative brain network architecture. Our post-training  
308 network's robustness and segregation can provide neuroprotection in PwPD [16], but  
309 the efficacy of such a mechanism depends on the balance between integration and  
310 segregation, featuring SW network architecture [58], [60].  
311

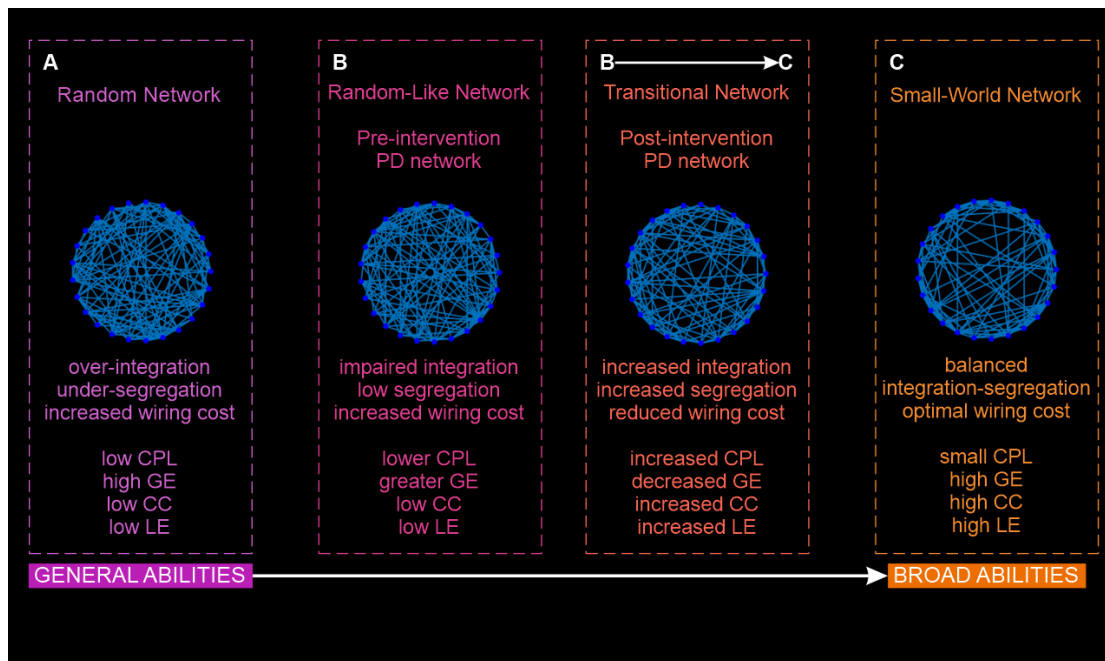

312

313 **Figure 3.** Illustration of our theoretical proposal. High integration (high GE) is  
314 characteristic of random networks (A), while regular networks show higher segregation  
315 (high LE). The optimal brain network organization is that of a SW network (C) balancing  
316 between high integration and segregation achieving the optimal wiring cost [15]. As  
317 reported by Dubbelink et. al [16] PD brain network organization, compared to controls,  
318 resembles that of random networks having less SW network characteristics (pre-  
319 training network, B). Changes in connectivity and graph-theory characteristics, as an  
320 outcome of the reparation neuroplasticity in the PD brain, characterize our post-training  
321 network (B → C) as a transitional network from a random-alike network (B) towards a  
322 SW-alike organization (C), meaning more balanced integration and segregation  
323 resulting in a restored brain organization for our PwPD.

324

## 325 **Whole-brain network reorganization improves motor execution and control**

326 Our multiple linear regression analysis revealed that SPPB total score correlates  
327 negatively with the post to pre differences of GE and TS, and positively with CPL post  
328 to pre changes. The higher total score of SPPB means reduced GE and TS and  
329 increased CPL. There is a relationship between better motor performance and  
330 reorganization of brain network connectivity patterns towards a more efficient  
331 architecture; better motor execution predicts a transition towards a reparative  
332 functional architecture, balancing both random and regular network characteristics.  
333 The improvements in gait, mobility, and balance, as aspects of the SPPB test [41],  
334 meaning improved preparation and control of movement, is correlated to a more  
335 efficient brain organization with more SW-alike characteristics. This correlation further  
336 supports our suggestion of a PT-induced network organization that can prepare for,  
337 and control motor tasks.

338 Motor severity in PD is correlated with the mean functional connectivity strength  
339 [9], meaning that disconnections observed in PD brain circuitry are linked to motor  
340 symptoms. The loss of integration in PD's network as the disease progresses is  
341 associated with motor disorientation and motor symptoms severity [16]. Here, we found  
342 not only a balance of excessive integration (increased CPL and decreased GE) as a  
343 PT result, but we report that this balance is connected to improved motor performance.  
344 Thus, we can imply that these indexes hold promise as surrogate markers of motor  
345 symptoms severity in PD.

346

## 347 **Future directions and limitations**

348 Our relatively small sample size (14 PwPD) and the lack of an age-matched control  
349 group (healthy old adults or passive PwPD) may have limited the interpretation of our  
350 findings. Accordingly, the effects of our intervention could have been classified  
351 concerning different PD motor subtypes (e.g. tremor-dominant or postural instability  
352 gait difficulty) or along the continuum of cognitive capacity (e.g. PD-MCI). The  
353 correlation of the improved motor execution with a reparative brain organization is in  
354 support of the beneficial contribution of PT to disease modification and points towards  
355 the use of physical activity as a supplement to pharmacotherapy. Future studies could  
356 be targeted in disentangling the elements of neuroplasticity induced by physical  
357 (and/or cognitive) training and identify their contribution to disease modification.  
358 Follow-up studies are essential to address the stability of the reported findings. Though  
359 the modulation of the DMN from the occipital gyrus could mean improved cognition in  
360 PwPD, this was not evident in our study. Future reports could provide more insight into

361 the possible relation of PT-induced reparative neuroplastic and cognitive capacities in  
362 PD.

363

## 364 **Conclusion**

365 Our study provides emphasizes the need to introduce physical exercise in the daily  
366 activities of PwPD. In contrast to previous studies that focused on the primary motor  
367 area, the focus here is on the whole-brain network level. PT facilitates neuroplasticity  
368 in the PD brain, and induces a transition from an impaired PD brain organization  
369 towards a reparative one, characterized by a more balanced integration and  
370 segregation of information flow. These training-induced changes are related to  
371 improved motor performance and thus improved motor control. To our knowledge, this  
372 is the first time that graph theory indexes of resting-state EEG data have been used to  
373 reveal meaningful relationships to underlying PD processes and outcomes of  
374 importance in a translational inquiry. The incorporation of a fully digital version of PT  
375 in the form of computerized serious games adds to the innovations brought about by  
376 our study.

377

## 378 **Materials and Methods**

### 379 **Subjects**

380 This is a study involving 14 PwPD (male: 12, mean age:  $65.5 \pm 7.12$ , years of  
381 education:  $13.64 \pm 3$ ) on stage II or III according to the unified Parkinson's disease rating  
382 scale (UPDRS) (11 subjects on stage II, mean UPDRS score:  $24 \pm 6.04$ ). The subjects  
383 underwent PT, as well as psychosomatic evaluation before and after the intervention.  
384 This study is part of the pdLLM clinical trial, registered with ClinicalTrials.gov (identifier  
385 code NCT04426903). The study's protocol was approved by the Bioethics Committee  
386 of the Medical School of the Aristotle University of Thessaloniki and was conducted  
387 under the Helsinki Declaration of Human Rights. All participants signed written  
388 informed consent before their inclusion in the study.

389

### 390 **Intervention Protocol**

391 The intervention consisted of PT. The study protocol was developed to improve the  
392 quality of life of people at risk for neurodegeneration such as PwPD. The training  
393 sessions were computerized, center-based, and conducted under supervision. The  
394 sequence of training methods was pseudo-randomized and counterbalanced. The

395 details of the PT intervention have been previously described in detail [62], [63]  
396 (summarized here in Figure 4). In short, PT is fully computerized here through the  
397 WebFitForAll facility, a web-service system through a general-purpose interface [64]  
398 and specific (serious) game-based activities of balance, endurance, flexibility, and  
399 aerobic exercise. The software has been used in many other studies (e.g., [29], [65])  
400 with beneficial results. The intervention lasted 10 weeks, with a frequency of two times  
401 per week for an hourly session, and took place at the Thessaloniki Active and Healthy  
402 Ageing Living Lab (Thess-AHALL) [66] and the Association of Parkinson's Patients and  
403 Friends of Northern Greece.

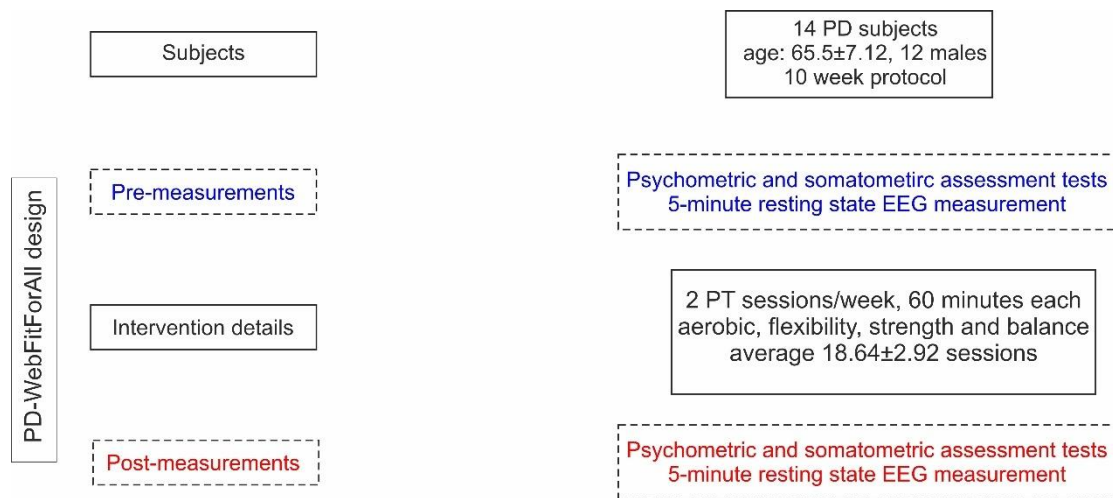

405 **Figure 4.** PD-WebFitForAll design and flow of PD participants

406

## 407 Physical training

408 PT is based on the WebFitForAll exergaming platform [64], which employs motion  
409 sensor devices (i.e., Kinect), allowing the users to practice and maintain their physical  
410 status and well-being. The training protocol consists of aerobic (cycling, in-place-  
411 hiking), flexibility (stretching), strength (weightlifting and resistance), and balance  
412 (static and dynamic) exercises in compliance to the ACSM and AHA recommendations  
413 [67]. Sports experts / physical educators and physiotherapists have defined a 50-70%  
414 intensity level of the maximum heart rate (HR<sub>max</sub>). The 10-minute warm-up phase  
415 precedes the main body of training (40 minutes) that is followed by 5 minutes' full  
416 recovery. For the aerobic exercises, the users are transferred to a virtual environment  
417 through Google maps and explore cities or landscapes. Upon correct completion of  
418 the flexibility and strength exercises, the trainees were progressively rewarded with an  
419 array of pleasing images. Balance exercises required the movement of the body in a  
420 horizontal or vertical axis [68].

421



## 422 **Psychometric and somatometric assessments**

423 The participants underwent assessments of their cognitive and physical capacity.  
424 The psychometric evaluation assessed attention, memory, and executive function,  
425 verbal fluency, mental flexibility, processing speed, and depression or well-being  
426 (MMSE [46], MoCA [47], Trail Making Test [69], PDQ-8 [48], Geriatric Depression  
427 Scale (GDS) [70]) The somatometric evaluation assessed the overall physical status,  
428 balance, walking, and risk of falls, via the 10 Meter Walk Test [45], the Community  
429 Balance & Mobility Scale [42], the Short Physical Performance Battery [41], the  
430 Fullerton Senior Fitness Test [43], the Berg Balance Scale [40], and the Tinetti Test  
431 [44].

432

## 433 **Experimental design and EEG recordings**

434 Pre- and post-intervention EEG resting-state activity was recorded measured for 5  
435 minutes, using a high-density Nihon-Kohden EEG device (128 active scalp electrode)  
436 at a sampling rate of 1000Hz. The EEG recordings were performed in an electrically  
437 shielded, sound, and light attenuated booth. The electrode impedances were kept  
438 lower than 10 k $\Omega$ . Participants were instructed to keep their eyes closed and to  
439 maintain a resting yet wakeful condition.

440

## 441 **EEG analysis**

### 442 **Preprocessing**

443 The raw EEG data were initially visually inspected, bad channels were interpolated,  
444 and ocular artifacts (blinks and horizontal movement) were corrected through adaptive  
445 artifact correction [71] using the Brain Electrical Source Analysis software (BESA  
446 research, version 6, Megis Software, Heidelberg, Germany) (Figure 5, orange section).  
447 The pruned data were imported in the Fieldtrip Matlab toolbox [72] for further  
448 processing. The EEG data were filtered using a high-pass IIR filter at 1 Hz, a notch IIR  
449 filter at 47-53 Hz, and a low-pass IIR filter at 97 Hz. Independent component analysis  
450 (ICA) [73] was applied to the filtered EEG data, and the artifactual components were  
451 rejected. The EEG data were further inspected, and all remaining visible artifacts were  
452 removed. We randomly selected 15 segments, each with a duration of 4 seconds, from  
453 each EEG recording for further processing.

454

## 455 **Source reconstruction**

456 Each subject's segments (15 segments, 4-sec duration each) were imported into  
457 BESA (Figure 5, blue section). The current density reconstructions (CDR) were  
458 estimated in the 1-30 Hz frequency band for every sample point, solving the inverse  
459 problem with the use of the LORETA [38], which does not require the *a priori*  
460 declaration of the number of sources and is suitable for whole cortex analysis. The  
461 CDRs were exported as four-dimensional images (4-D), which were, in turn, imported  
462 into Matlab. The imported images were further processed by superimposing a cortex  
463 mask including only grey matter, which excludes the brainstem and cerebellum, to limit  
464 the source space [74]. The source space consisted of 863 voxels.

465

## 466 **Functional connectivity**

467 The exported time-series of each voxel from the 4-D images were used to compute  
468 the Phase Transfer Entropy (PTE) (Figure 5, green section) [39]. Each voxel was  
469 considered as a node of the calculated network. The computation resulted in 863×863  
470 adjacency matrices, with the metric calculated independently for every voxel of every  
471 segment. The benefit of using PTE is that its results are not based on a specific data  
472 model because its computation relies on non-linear probability distributions. This  
473 allows for the detection of higher-order relations in the phase information flow and  
474 renders the measure impervious to source leakage [39]. The adjacency matrices,  
475 which were calculated separately for every segment, were averaged, resulting in a  
476 single connectivity matrix per subject. This methodology was previously used for a  
477 cross-sectional MEG resting-state analysis [75].

478

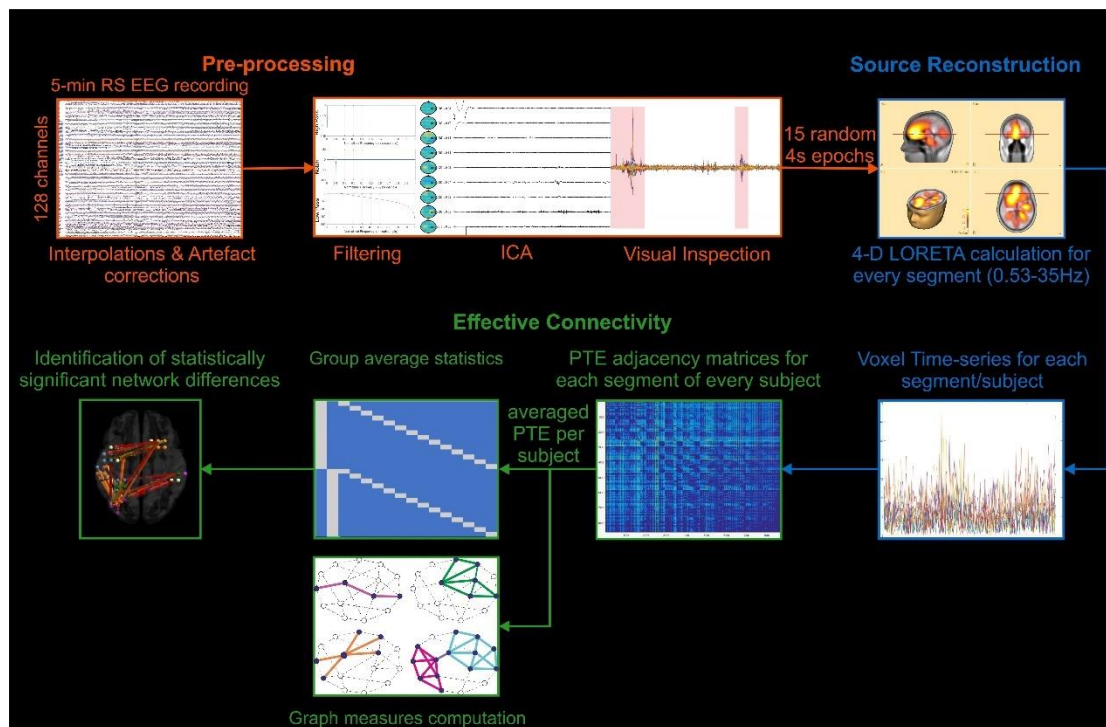

479

480 **Figure 5.** EEG data analysis schematic. **Pre-processing** (orange): EEG data were  
481 first high-pass, bandpass, and low-pass filtered. ICA and visual inspection were used  
482 to reject artefactual data. Following, 15 segments of 4-s were randomly selected.  
483 **Source reconstruction** (blue): The data were frequency filtered within 1-30 Hz,  
484 source reconstructed (4-D LORETA), and an 863-node homemade atlas was used to  
485 extract the time-series of every voxel from every segment per subject. **Functional**  
486 **connectivity** (green): Directed functional connectivity was computed for every  
487 segment of every subject, using the phase transfer entropy metric (PTE), and the 15  
488 matrices of every subject were averaged into one. A network science approach was  
489 taken for the computation of graph measures per subject. Group average statistics  
490 were calculated to identify the statistically significant differences of post- and pre-  
491 intervention networks.

492

### 493 **Graph measures computation**

494 The Brain Connectivity Toolbox [76] was used to compute the graph measures of  
495 global (transitivity) and local clustering coefficient, global and local efficiency, and node  
496 betweenness centrality for each participant. The node degree centrality was also  
497 computed with the use of a Matlab function. The density of each graph was calculated  
498 by summarizing all the weights of the graph.

499 CPL is the average shortest path length of the edges connecting the nodes of the  
500 network [77], and GE is the average inverse shortest path length of the network [78].

501 TS of a graph is the ratio of closed triplets to the maximum number of triplets (open  
502 and closed) [79]. An open triplet is three nodes with one and/or two connections  
503 between them, while a closed triplet is three nodes with three connections between  
504 them (i.e., a triangle). CC of a node is the ratio of its connected neighbors to the  
505 maximum number of possible connections [77]. LE of a node is the computation of GE  
506 on a local level, strongly related to CC [15]. BC measures the importance of a node in  
507 the communication of the network's other nodes and corresponds to the fraction of all  
508 shortest path that passes through the node [76]. DC identifies the number of  
509 connections inward and outward of a node, i.e., it indicates that the higher the degree,  
510 the more prominent a node is to the network.

511 Possible integration shifts were examined through CPL and GE, which quantify the  
512 efficacy of information transference and its assimilation in the network [76]. TS and CC  
513 were computed to investigate the training's effect on robustness, and to determine if  
514 the intervention could affect segregation through the clustering organization of the PD  
515 brain network [76]. Similarly, LE was used to interpret any changes in the segregation  
516 of the network. BC quantifies the importance of a node in the information flow between  
517 nodes [76].

518

## 519 **Statistical analysis**

520 The pre- and post-intervention somatometric and psychometric assessment scores  
521 were compared using non-parametric Wilcoxon tests and paired t-tests. The statistical  
522 comparisons were performed using the IBM SPSS 25.0 software. Wilcoxon tests were  
523 performed on the psychometric battery tests and somatometric tests with a discrete-  
524 values score, while paired t-tests were applied on the remaining somatometric  
525 assessment tests.

526 The Network Based Statistics (NBS) [80] toolbox was employed to estimate the  
527 statistically significant differences between the pre- and post-intervention connectivity  
528 networks. A paired-samples t-test was performed, with the significance threshold  
529 defined at  $p < 0.05$ , corrected using 10000 random comparisons via False Discovery  
530 Rate (FDR) correction. The significant differences between the two time points were  
531 visualized as weighted graphs through the BrainNet Viewer [81] toolbox. DC was  
532 calculated from the outcome of this comparison, and the results were depicted in the  
533 same graph.

534 Analysis of Covariance (ANCOVA) was used for the graph measures. Each  
535 measure was the dependent variable with density being the covariate because density  
536 seriously affects the computation of the other measures. For local measures (i.e., CC

537 and BC), ANCOVA with FDR correction on the p-values for Type I errors was  
538 performed for each of the 863 nodes.

539 The relationship between graph measures and assessment scores was examined  
540 by employing the linear regression model, which can determine the possible prediction  
541 of a dependent variable via an explanatory one (independent variable). The linear  
542 regression model was calculated on the difference of pre- and post-training  
543 measurements with elements of both graph measures and assessment scores set as  
544 the independent variable. Thus, we investigated whether shifts in the cortical  
545 organization could predict the beneficial impact of the intervention on the physical and  
546 cognitive capacity of our subjects and the opposite. The statistical significance of the  
547 prediction was tested by F-test at a significance level of  $p < 0.05$ .

548

## 549 **Competing interests**

550 There are potential conflicts of interest (other, not financial, outside the scope of the  
551 submitted work) for the author P. Bamidis in respect of the Aristotle University of  
552 Thessaloniki (AUTH). WebFirForAll has been developed at AUTH, as an extension of  
553 FitForAll (FFA), originally developed in AUTH during the Long Lasting Memories (LLM  
554 Project) ([www.longlastingmemories.eu](http://www.longlastingmemories.eu)), funded in the beginning by the ICT-CIP-PSP  
555 Program of the European Commission. It now forms part of LLM Care  
556 ([www.llmcare.gr/en](http://www.llmcare.gr/en)), a technology transfer/self-funded initiative that emerged as the  
557 non-for-profit business exploitation of LLM.

558

## 559 **Acknowledgments**

560 This work was partly supported by the EU H2020 PHC 2014 2015/H2020 PHC  
561 2015, grant agreement N 690494: 'i Prognosis' project ( [www.i-prognosis.eu](http://www.i-prognosis.eu) ) and  
562 partly supported by the European CIP ICT PSP.2008.1.4 Long Lasting memories  
563 (LLM) project (Project No. 238904) [www.longlastingmemories.eu](http://www.longlastingmemories.eu)), as well as, its  
564 subsequent business exploitation scheme, namely, LLM Care, which is a self-funded  
565 initiative at the Aristotle University of Thessaloniki ([www.llmcare.gr](http://www.llmcare.gr)). The study has  
566 also benefited from an internship program for undergraduate students, funded by the  
567 European Social Fund and co-financed by Greek National Resources through the  
568 Operational Program "Competitiveness, Entrepreneurship and Innovation" of the  
569 Corporate Pact for the Growth Framework 2014-2020, through the Intermediate  
570 Managing Agency on "Human Resources, Education and Lifelong Learning " of the

571 Greek Ministry. The authors would like to thank all the participants, their families, and  
572 caregivers, the Association of Parkinson's Patients and Friends of Northern Greece,  
573 as well as Fotini Dolianiti, Antonios Gantaras, Stylianos Gavriilidis, Sotiria Gylou,  
574 Georgina Ilia, Katerina Katsouli, Maria Meitanidou, Ioannis Papadopoulos, Tzortzina  
575 Papaioannou, and Dimitrios Sarris (in alphabetical order) for pilot execution. The  
576 authors would also like to acknowledge the contribution of technical support provided  
577 by Theodoros Savvidis, Athina Grammatikopoulou, and Michael Stadtschnitzer.  
578 Clinical expertise has been provided by Neurologists Sevatsi-Maria Bostanjopoulou  
579 and Zoe Katsarou who are also the scientific advisors of the Association of Parkinson's  
580 Patients and Friends of Northern Greece. In addition, the authors would like to  
581 acknowledge the support of the iPrognosis consortium, led by Prof. Leontios  
582 Hadjileontiadis.

583

## 584 **References**

- 585 [1] S. Trojan and J. Pokorny, "Theoretical aspects of neuroplasticity," *Physiol. Res.*,  
586 vol. 48, pp. 87–98, 1999.
- 587 [2] J. Jankovic, "Parkinson's disease: Clinical features and diagnosis," *J. Neurol.*  
588 *Neurosurg. Psychiatry*, vol. 79, no. 4, pp. 368–376, 2008.
- 589 [3] P. Calabresi, B. Picconi, A. Tozzi, and M. Di Filippo, "Dopamine-mediated  
590 regulation of corticostriatal synaptic plasticity," *Trends Neurosci.*, vol. 30, no. 5,  
591 pp. 211–219, 2007.
- 592 [4] A. M. Enciu, M. I. Nicolescu, C. G. Manole, D. F. Mureşanu, L. M. Popescu, and  
593 B. O. Popescu, "Neuroregeneration in neurodegenerative disorders," *BMC*  
594 *Neurol.*, vol. 11, no. 1, p. 75, 2011.
- 595 [5] R. Biundo *et al.*, "Brain volume changes in Parkinson's disease and their  
596 relationship with cognitive and behavioural abnormalities," *J. Neurol. Sci.*, vol.  
597 310, no. 1–2, pp. 64–69, 2011.
- 598 [6] D. O. Claassen *et al.*, "Cortical asymmetry in Parkinson's disease: early  
599 susceptibility of the left hemisphere," *Brain Behav.*, vol. 6, no. 12, p. e00573,  
600 2016.
- 601 [7] T. Wu *et al.*, "Functional connectivity of cortical motor areas in the resting state  
602 in Parkinson's disease," *Hum. Brain Mapp.*, vol. 32, no. 9, pp. 1443–1457, 2011.
- 603 [8] H. C. Baggio *et al.*, "Functional brain networks and cognitive deficits in



- 604 Parkinson's disease," *Hum. Brain Mapp.*, vol. 35, no. 9, pp. 4620–4634, 2014.
- 605 [9] C. Y. Luo *et al.*, "Functional connectome assessed using graph theory in drug-  
606 naive Parkinson's disease," *J. Neurol.*, vol. 262, no. 6, pp. 1557–1567, 2015.
- 607 [10] A. Tessitore *et al.*, "Default-mode network connectivity in cognitively unimpaired  
608 patients with Parkinson disease," *Neurology*, vol. 79, no. 23, pp. 2226–2232,  
609 2012.
- 610 [11] A. Cronin-Golomb, "Parkinson's disease as a disconnection syndrome,"  
611 *Neuropsychol. Rev.*, vol. 20, no. 2, pp. 191–208, 2010.
- 612 [12] M. Tahmasian *et al.*, "Resting-state functional reorganization in Parkinson's  
613 disease: An activation likelihood estimation meta-analysis," *Cortex*. 2017.
- 614 [13] M. Göttlich, T. F. Münte, M. Heldmann, M. Kasten, J. Hagenah, and U. M.  
615 Krämer, "Altered Resting State Brain Networks in Parkinson's Disease," *PLoS*  
616 *One*, vol. 8, no. 10, 2013.
- 617 [14] M. Sharman *et al.*, "Parkinson's disease patients show reduced cortical-  
618 subcortical sensorimotor connectivity," *Mov. Disord.*, vol. 28, no. 4, pp. 447–  
619 454, 2013.
- 620 [15] E. Bullmore and O. Sporns, "Complex brain networks: graph theoretical analysis  
621 of structural and functional systems.," *Nat Rev Neurosci.*, vol. 10, no. 3, pp. 186–  
622 198, Mar. 2009.
- 623 [16] K. T. E. Olde Dubbelink *et al.*, "Disrupted brain network topology in Parkinson's  
624 disease: A longitudinal magnetoencephalography study," *Brain*, vol. 137, no. 1,  
625 pp. 197–207, 2014.
- 626 [17] R. L. Utianski *et al.*, "Graph theory network function in parkinson's disease  
627 assessed with electroencephalography," *Clin. Neurophysiol.*, vol. 127, no. 5, pp.  
628 2228–2236, 2016.
- 629 [18] E. Bezard, C. E. Gross, and J. M. Brotchie, "Presymptomatic compensation in  
630 Parkinson's disease is not dopamine-mediated," *Trends Neurosci.*, vol. 26, no.  
631 4, pp. 215–221, 2003.
- 632 [19] J. P. Mole, L. Subramanian, T. Bracht, H. Morris, C. Metzler-Baddeley, and D.  
633 E. J. Linden, "Increased fractional anisotropy in the motor tracts of Parkinson's  
634 disease suggests compensatory neuroplasticity or selective  
635 neurodegeneration," *Eur. Radiol.*, vol. 26, no. 10, pp. 3327–3335, 2016.
- 636 [20] H. Bernheimer, W. Birkmayer, O. Hornykiewicz, K. Jellinger, and F.

- 637           Seitelberger, “Brain dopamine and the syndromes of Parkinson and Huntington  
638           Clinical, morphological and neurochemical correlations,” *J. Neurol. Sci.*, vol. 20,  
639           no. 4, pp. 415–455, 1973.
- 640 [21] A. K. Kakkar and N. Dahiya, “Management of Parkinson’s disease: Current and  
641           future pharmacotherapy,” *Eur. J. Pharmacol.*, vol. 750, pp. 74–81, 2015.
- 642 [22] M. A. Hirsch, E. E. H. van Wegen, M. A. Newman, and P. C. Heyn, “Exercise-  
643           induced increase in brain-derived neurotrophic factor in human Parkinson’s  
644           disease: A systematic review and meta-analysis,” *Transl. Neurodegener.*, vol.  
645           7, no. 1, p. 7, 2018.
- 646 [23] C. Duchesne *et al.*, “Influence of aerobic exercise training on the neural  
647           correlates of motor learning in Parkinson’s disease individuals,” *NeuroImage*  
648           *Clin.*, 2016.
- 649 [24] C. Fontanesi *et al.*, “Intensive Rehabilitation Enhances Lymphocyte BDNF-TrkB  
650           Signaling in Patients with Parkinson’s Disease,” *Neurorehabil. Neural Repair*,  
651           vol. 30, no. 5, pp. 411–418, 2016.
- 652 [25] S. S. Paul, C. G. Canning, J. Song, V. S. C. Fung, and C. Sherrington, “Leg  
653           muscle power is enhanced by training in people with Parkinson’s disease: A  
654           randomized controlled trial,” *Clin. Rehabil.*, vol. 28, no. 3, pp. 275–288, 2014.
- 655 [26] D. Conradsson *et al.*, “The effects of highly challenging balance training in  
656           elderly with Parkinson’s disease: A randomized controlled trial,” *Neurorehabil.*  
657           *Neural Repair*, vol. 29, no. 9, pp. 827–836, 2015.
- 658 [27] C. Silva-Batista *et al.*, “Resistance Training with Instability for Patients with  
659           Parkinson’s Disease,” *Med. Sci. Sports Exerc.*, vol. 48, no. 9, pp. 1678–1687,  
660           2016.
- 661 [28] E. I. Konstantinidis, A. S. Billis, C. A. Mouzakidis, V. I. Zilidou, P. E. Antoniou,  
662           and P. D. Bamidis, “Design, implementation and wide pilot deployment of  
663           FitForAll: an easy to use exergaming platform improving physical fitness and life  
664           quality of senior citizens.,” *IEEE J. Biomed. Heal. Informatics.*, vol. 20, no. 1, pp.  
665           189–200, Jan. 2014.
- 666 [29] C. Styliadis, P. Kartsidis, E. Paraskevopoulos, A. A. Ioannides, and P. D.  
667           Bamidis, “Neuroplastic Effects of Combined Computerized Physical and  
668           Cognitive Training in Elderly Individuals at Risk for Dementia: An eLORETA  
669           Controlled Study on Resting States,” *Neural Plast.*, vol. 2015, pp. 1–12, 2015.

- 670 [30] G.-H. Lee, "Virtual-reality balance training with Nintendo-Wii games improves  
671 dynamic balance in Parkinson's disease patients," *Mov. Disord.*, 2016.
- 672 [31] X. Shen and M. K. Y. Mak, "Technology-assisted balance and gait training  
673 reduces falls in patients with Parkinson's disease: A randomized controlled trial  
674 with 12-month follow-up," *Neurorehabil. Neural Repair*, vol. 29, no. 2, pp. 103–  
675 111, 2015.
- 676 [32] L.-L. Gao and T. Wu, "The study of brain functional connectivity in Parkinson's  
677 disease.," *Transl. Neurodegener.*, vol. 5, p. 18, 2016.
- 678 [33] A. Tessitore, M. Cirillo, and R. De Micco, "Functional Connectivity Signatures of  
679 Parkinson's Disease," *J. Parkinsons. Dis.*, vol. 9, no. 4, pp. 637–652, 2019.
- 680 [34] E. B. Beall *et al.*, "The Effect of Forced-Exercise Therapy for Parkinson's  
681 Disease on Motor Cortex Functional Connectivity," *Brain Connect.*, 2013.
- 682 [35] C. Shah *et al.*, "Exercise Therapy for Parkinson's Disease: Pedaling Rate Is  
683 Related to Changes in Motor Connectivity," *Brain Connect.*, 2016.
- 684 [36] S. Bonni *et al.*, "Neurophysiological and clinical effects of blindfolded balance  
685 training (BBT) in Parkinson's disease patients: A preliminary study," *Eur. J.*  
686 *Phys. Rehabil. Med.*, 2019.
- 687 [37] A. Droby, I. Maidan, Y. Jacob, N. Giladi, J. M. Hausdorff, and A. Mirelman,  
688 "Distinct Effects of Motor Training on Resting-State Functional Networks of the  
689 Brain in Parkinson's Disease," *Neurorehabil. Neural Repair*, 2020.
- 690 [38] R. D. Pascual-Marqui, C. M. Michel, and D. Lehmann, "Low resolution  
691 electromagnetic tomography: a new method for localizing electrical activity in  
692 the brain," *Int. J. Psychophysiol.*, vol. 18, no. 1, pp. 49–65, Oct. 1994.
- 693 [39] M. Lobier, F. Siebenhühner, S. Palva, and J. M. Palva, "Phase transfer entropy:  
694 A novel phase-based measure for directed connectivity in networks coupled by  
695 oscillatory interactions," *Neuroimage*, vol. 85, pp. 853–872, 2014.
- 696 [40] K. Berg, S. Wood Dauphinee, J. Williams, and D. Gayton, "Measuring balance  
697 in the elderly: preliminary development of an instrument," *Physiother. Canada*,  
698 vol. 41, no. 6, pp. 304–311, Nov. 1989.
- 699 [41] J. M. Guralnik *et al.*, "A short physical performance battery assessing lower  
700 extremity function: association with self-reported disability and prediction of  
701 mortality and nursing home admission.," *J. Gerontol.*, vol. 49, no. 2, pp. M85–  
702 94, 1994.

- 703 [42] J. A. Howe, E. L. Inness, A. Venturini, J. I. Williams, and M. C. Verrier, "The  
704 Community Balance and Mobility Scale - A balance measure for individuals with  
705 traumatic brain injury," *Clin. Rehabil.*, vol. 20, no. 10, pp. 885–895, 2006.
- 706 [43] A. Rozanska-Kirschke, P. Kocur, M. Wilk, and P. Dylewicz, "The Fullerton  
707 Fitness Test as an index of fitness in the elderly," *Med. Rehabil.*, vol. 10, no. 2,  
708 pp. 9–16, 2006.
- 709 [44] M. Tinetti, "Performance-oriented assessment of mobility problems in elderly  
710 patients," *J. Am. Geriatr. Soc.*, vol. 34, no. 2, pp. 119–126, 1986.
- 711 [45] M. J. Watson, "Refining the ten-metre walking test for use with neurologically  
712 impaired people," *Physiotherapy*, vol. 88, no. 7, pp. 386–397, 2002.
- 713 [46] M. F. Folstein, S. E. Folstein, and P. R. McHugh, "'Mini-mental state'. A practical  
714 method for grading the cognitive state of patients for the clinician.," *J. Psychiatr.  
715 Res.*, vol. 12, no. 3, pp. 189–98, Nov. 1975.
- 716 [47] Z. S. Nasreddine *et al.*, "The Montreal Cognitive Assessment, MoCA: a brief  
717 screening tool for mild cognitive impairment.," *J. Am. Geriatr. Soc.*, vol. 53, no.  
718 4, pp. 695–9, Apr. 2005.
- 719 [48] Z. Katsarou, S. Bostantjopoulou, V. Peto, A. Kafantari, E. Apostolidou, and E.  
720 Peitsidou, "Assessing quality of life in Parkinson's disease: Can a short-form  
721 questionnaire be useful?," *Mov. Disord.*, vol. 19, no. 3, pp. 308–312, Mar. 2004.
- 722 [49] B. T. T. Yeo *et al.*, "The organization of the human cerebral cortex estimated by  
723 intrinsic functional connectivity.," *J. Neurophysiol.*, vol. 106, no. 3, pp. 1125–65,  
724 Sep. 2011.
- 725 [50] C. G. Canning *et al.*, "Exercise for falls prevention in Parkinson disease: A  
726 randomized controlled trial," *Neurology*, vol. 84, no. 3, pp. 304–312, 2015.
- 727 [51] A. Nadeau, E. Pourcher, and P. Corbeil, "Effects of 24 wk of treadmill training  
728 on gait performance in parkinson's disease," *Med. Sci. Sports Exerc.*, 2014.
- 729 [52] O. Lucas-Jiménez *et al.*, "Altered functional connectivity in the default mode  
730 network is associated with cognitive impairment and brain anatomical changes  
731 in Parkinson's disease," *Park. Relat. Disord.*, vol. 3, pp. 58–64, 2016.
- 732 [53] K. T. E. O. Dubbelink, M. M. Schoonheim., J. B. Deijen, J. W. R. Twisk, F.  
733 Barkhof, and H. W. Berendse, "Functional connectivity and cognitive decline  
734 over 3 years in Parkinson disease," *Neurology*, vol. 83, no. 22, pp. 2046–2053,  
735 2014.

- 736 [54] Y. Hou *et al.*, “Dysfunction of the default mode network in drug-naïve  
737 parkinson’s disease with mild cognitive impairments: A resting-state fMRI  
738 study,” *Front. Aging Neurosci.*, vol. 8, p. 247, 2016.
- 739 [55] M. Hassan *et al.*, “Functional connectivity disruptions correlate with cognitive  
740 phenotypes in Parkinson’s disease,” *NeuroImage Clin.*, vol. 14, pp. 591–601,  
741 2017.
- 742 [56] E. F. Cardoso *et al.*, “Abnormal visual activation in Parkinson’s disease  
743 patients,” *Mov. Disord.*, vol. 25, no. 11, pp. 1590–1596, 2010.
- 744 [57] S. Marek and N. U. F. Dosenbach, “The frontoparietal network: Function,  
745 electrophysiology, and importance of individual precision mapping,” *Dialogues  
746 Clin. Neurosci.*, vol. 20, no. 2, p. 133, 2018.
- 747 [58] A. K. Barbey, “Network Neuroscience Theory of Human Intelligence,” *Trends  
748 Cogn. Sci.*, vol. 22, no. 1, pp. 8–20, 2018.
- 749 [59] D. S. Bassett and E. T. Bullmore, “Small-World Brain Networks Revisited,”  
750 *Neuroscientist*, vol. 23, no. 5, pp. 499–516, 2017.
- 751 [60] K. Hilger, M. Fukushima, O. Sporns, and C. J. Fiebach, “Temporal stability of  
752 functional brain modules associated with human intelligence,” *Hum. Brain  
753 Mapp.*, vol. 41, no. 2, pp. 362–372, 2019.
- 754 [61] R. Lopes *et al.*, “Cognitive phenotypes in parkinson’s disease differ in terms of  
755 brain-network organization and connectivity,” *Hum. Brain Mapp.*, vol. 38, no. 3,  
756 pp. 1604–1621, 2017.
- 757 [62] E. I. Konstantinidis, A. S. Billis, W. Hlauschek, P. Panek, and P. D. Bamidis,  
758 “Integration of cognitive and physical training in a smart home environment for  
759 the elderly people.,” *Stud. Health Technol. Inform.*, vol. 160, no. Pt 1, pp. 58–  
760 62, Jan. 2010.
- 761 [63] P. D. Bamidis *et al.*, “Gains in cognition through combined cognitive and  
762 physical training: the role of training dosage and severity of neurocognitive  
763 disorder.,” *Front. Aging Neurosci.*, vol. 7, no. 152, p. 152, 2015.
- 764 [64] E. I. Konstantinidis, G. Bamparopoulos, and P. D. Bamidis, “Moving Real  
765 Exergaming Engines on the Web: The webFitForAll case study in an active and  
766 healthy ageing living lab environment,” *IEEE J Biomed Heal. Inform.*, vol. 21,  
767 no. 3, pp. 859–866, Apr. 2016.
- 768 [65] A. C. Tsolaki *et al.*, “Web-based intervention effects on mild cognitive

- 769 impairment based on apolipoprotein e genotype: Quasi-experimental study,” *J.*  
770 *Med. Internet Res.*, 2020.
- 771 [66] E. D. Romanopoulou, V. I. Zilidou, and P. D. Bamidis., “Creating and sustaining  
772 a social health care ecosystem: the case of LLM care services in Greece,” *Hell.*  
773 *J. Nucl. Med.*, vol. 20, no. 2, pp. 40–48, 2017.
- 774 [67] M. E. Nelson *et al.*, “Physical activity and public health in older adults:  
775 recommendation from the American College of Sports Medicine and the  
776 American Heart Association.,” *Circulation*, vol. 116, no. 9, pp. 1094–105, Aug.  
777 2007.
- 778 [68] V. I. Zilidou, E. I. Konstantinidis, E. D. Romanopoulou, M. Karagianni, P.  
779 Kartsidis, and P. D. Bamidis, “Investigating the effectiveness of physical training  
780 through exergames: Focus on balance and aerobic protocols,” in *2016 1st*  
781 *International Conference on Technology and Innovation in Sports, Health and*  
782 *Wellbeing (TISHW)*, 2016, pp. 1–6.
- 783 [69] T. N. Tombaugh, “Trail Making Test A and B: Normative data stratified by age  
784 and education,” *Arch. Clin. Neuropsychol.*, vol. 19, no. 2, pp. 203–214, 2004.
- 785 [70] J. A. Yesavage, “Geriatric Depression Scale.,” *Psychopharmacol. Bull.*, vol. 24,  
786 no. 4, pp. 709–11, Jan. 1988.
- 787 [71] N. Ille, P. Berg, and M. Scherg, “Artifact correction of the ongoing EEG using  
788 spatial filters based on artifact and brain signal topographies.,” *J. Clin.*  
789 *Neurophysiol.*, vol. 19, no. 2, pp. 113–24, Apr. 2002.
- 790 [72] R. Oostenveld, P. Fries, E. Maris, and J. M. Schoffelen, “FieldTrip: Open source  
791 software for advanced analysis of MEG, EEG, and invasive electrophysiological  
792 data.,” *Comput. Intell. Neurosci.*, vol. 2011, p. 156869, Jan. 2011.
- 793 [73] T.-W. Lee, M. Girolami, and T. J. Sejnowski, “Independent Component Analysis  
794 using an Extended Infomax Algorithm for Mixed Sub - Gaussian and Super -  
795 Gaussian Sources,” *Neural Comput.*, vol. 11, no. 2, pp. 409–433, 1999.
- 796 [74] E. Paraskevopoulos, A. Kraneburg, S. C. Herholz, P. D. Bamidis, and C. Pantev,  
797 “Musical expertise is related to altered functional connectivity during audiovisual  
798 integration,” *Proc. Natl. Acad. Sci.*, vol. 112, no. 40, p. 201510662, 2015.
- 799 [75] E. Paraskevopoulos, C. Dobel, A. Wollbrink, V. Salvari, P. D. Bamidis, and C.  
800 Pantev, “Maladaptive alterations of resting state cortical network in Tinnitus: A  
801 directed functional connectivity analysis of a larger MEG data set,” *Sci. Rep.*,



802 2019.

803 [76] M. Rubinov and O. Sporns, “Complex network measures of brain connectivity:  
804 uses and interpretations.,” *Neuroimage*, vol. 52, no. 3, pp. 1059–69, Sep. 2010.

805 [77] D. J. Watts and S. H. Strogatz, “Collective dynamics of ‘small-world’ networks,”  
806 *Nature*, vol. 393, no. 6684, pp. 440–442, Jun. 1998.

807 [78] V. Latora and M. Marchiori, “Efficient Behavior of Small-World Networks,” *Phys.*  
808 *Rev. Lett.*, vol. 87, no. 19, p. 198701, Oct. 2001.

809 [79] M. E. J. Newman, “The structure and function of complex networks,” *SIAM Rev.*,  
810 vol. 45, no. 2, pp. 167–256, 2003.

811 [80] A. Zalesky, A. Fornito, and E. T. Bullmore, “Network-based statistic: identifying  
812 differences in brain networks.,” *Neuroimage*, vol. 53, no. 4, pp. 1197–207, Dec.  
813 2010.

814 [81] M. Xia, J. Wang, and Y. He, “BrainNet Viewer: a network visualization tool for  
815 human brain connectomics.,” *PLoS One*, vol. 8, no. 7, p. e68910, Jan. 2013.

816
